# Supplementary material
Source: Frontiers journal article supplement (https://www.frontiersin.org/articles/531916)
Supplement: Data_Sheet_1.PDF [file Data_Sheet_1.PDF]

## Supplementary Material

### 1 Ludography

Below is a complete list of games used in the analysis for reexamining core tasks, and identifying their supporting assistance techniques. These are referenced in the paper using the items numbers below.

- L1. 343 Industries, 2015, *Halo 5*, Microsoft Studio, USA.
- L2. Alawar Entertainment, 2010, *Grace's Quest: To Catch An Art Thief*, Alawar Entertainment, Russia.
- L3. Amusement Vision, 2001, *Super Monkey Ball*, Sega, Japan.
- L4. Awem Games, 2010, *Golden Trails: The New Western Rush*, Awm Games, Belarus.
- L5. Behaviour Interactive, 2016, *Dead by Daylight*, PC, Starbreeze Studios, Sweden.
- L6. Blizzard Entertainment, 1996, *Diablo*, PC, Blizzard Entertainment, USA.
- L7. Blizzard Entertainment, 2004, *World of Warcraft*, PC, Blizzard Entertainment, USA.
- L8. Blizzard Entertainment, 2012, *Diablo III*, Blizzard Entertainment, USA.
- L9. Blizzard Entertainment, 2016, *Overwatch*, PC, PS4, Xbox One, Blizzard Entertainment, USA.
- L10. Capcom, 1987, *Street Fighter*, Arcade, Capcom, Japan.
- L11. Capcom, 1996, *Resident Evil (aka Bio Hazard)*, PlayStation, Capcom, Japan.
- L12. Capcom, 2004, *Monster Hunter*, Capcom, Japan.
- L13. Capcom, 2018, *Monster Hunter: World*, PlayStation 4, Xbox One, Windows, Capcom, Japan.
- L14. CD Projekt Red, 2015, *The Witcher 3*, CD Projekt, Poland.
- L15. Creability, 2017, *OLDTV*, PC, Creability, UAE.
- L16. CyberConnect2, 2008, *Naruto: Ultimate Ninja*, Namco Bandai Games, USA.
- L17. Dontnod Entertainment, 2015, *Life Is Strange*, Square Enix, Japan.
- L18. EA DICE, 2013, *Battlefield 4*, Electronic Arts, USA.
- L19. Ensemble Studios, 1999, *Age of Empires II*, Microsoft, USA.
- L20. Epic Games, 2017, *Fortnite*, Epic Games, USA.
- L21. Game Freak, 2004, *Pokémon FireRed and LeafGreen*, The Pokémon Company, Nintendo, Japan.
- L22. Giants Software, 2012, *Farming Simulator*, Focus Home Interactive, France.
- L23. Harmonix, 2005, *Guitar Hero*, PlayStation 2, RedOctance, USA.
- L24. Harmonix, 2010, *Dance Central*, MTV Games and Microsoft Studios, USA.
- L25. Hidden Path Entertainment, 2012, *Counter-Strike Global Offensive*, PC, Consoles, Valve Corp., USA.
- L26. id Software, 1999, *Quake III Arena*, Activision, USA.
- L27. Infinity Ward, 2003, *Call of Duty*, Windows, Activision, USA.
- L28. Insomniac Games, 1998, *Spyro*, Sony Computer Entertainment, Japan.
- L29. King, 2012, *Candy Crush Saga*, King, United Kingdom.
- L30. Konami, 1987, *Metal Gear*, Konami, Japan.
- L31. Konami, 1998, *Dance Dance Revolution*, Arcade, Konami, Nintendo, Japan.
- L32. Level-5, 2007, *Professor Layton and the Curious Village*, Nintendo, Japan.
- L33. Magic Pockets, 2003, *Harry Potter: Quidditch World Cup*, EA Games, USA.

- L34. Monomi Park, 2017, *Slime Rancher*, Monomi Park, USA.
- L35. Nadeo, 2016, *TrackMania Turbo*, Ubisoft, France.
- L36. Namco, 1994, *Tekken*, Arcade, Bandai Namco Studios, Japan.
- L37. Nintendo EPD, 2017, *Legend of Zelda: Breath of the Wild*, Nintendo, Japan.
- L38. Nintendo, 1981, *Donkey Kong*, Arcade, Nintendo, Japan.
- L39. Nintendo, 1985, *Super Mario Bros.*, Famicom/NES, Nintendo, Japan.
- L40. Nintendo, 1986, *Legend of Zelda*, Famicom/NES, Nintendo, Japan.
- L41. Nintendo, 2001, *Animal Crossing*, Nintendo, Japan.
- L42. Orneon, 2011, *The Agency of Anomalies*, Big Fish Games, USA.
- L43. Psyonix, 2015, *Rocket League*, Psyonix, USA.
- L44. PUBG Corporation, 2017, *PlayerUnknown's Battlegrounds (PUBG)*, PUBG Corporation, Microsoft Studios, USA.
- L45. Rebellion Developments, 2005, *Sniper Elite*, Namco, Rebellion, USA.
- L46. Riot Games, 2009, *League of Legends*, PC, Riot Games, USA.
- L47. Rockstar Games, 2013, *Grand Theft Auto V*, Rockstar Games, USA.
- L48. Square Enix, 2002, *Kingdom Hearts*, Square Enix, Japan.
- L49. Sucker Punch Productions, 2002, *Sly Cooper*, PlayStation 2, Sony Computer Entertainment, USA.
- L50. Telltale Games, 2013, *The Wolf Among Us*, Telltale Games, USA.
- L51. Terminal Reality, 2012, *Kinect Star Wars*, LucasArts and Microsoft Studios, USA.
- L52. Turn 10 Studios, 2005, *Forza Motorsport*, Xbox, Microsoft Game Studios, USA.
- L53. Valve Corporation, 2013, *Dota 2*, Valve Corporation, USA.
- L54. Visual Concepts, 2018, *NBA 2K19*, 2K Sports, USA.

## 2 Genres and sub-genres used in initial game selection.

This list was only used to help diversify our initial game selection. Subsequent iterations relied on selecting games that maximized variability based on our initial coding. The non-exhaustive list of genres and sub-genres comes from [https://en.wikipedia.org/wiki/List\\_of\\_video\\_game\\_genres](https://en.wikipedia.org/wiki/List_of_video_game_genres), and game examples are drawn from the descriptions on this page.

| Genre            | Subgenre                 | Initially Selected Games | Core Task(s)                                                                                                                                           |
|------------------|--------------------------|--------------------------|--------------------------------------------------------------------------------------------------------------------------------------------------------|
| Action           | Platformer               | Donkey Kong              | Reaction Time, Steering                                                                                                                                |
| Action           | Platformer               | Super Mario              | Aiming, Reaction Time, Steering                                                                                                                        |
| Action           | Shooter                  | Call of Duty, Overwatch  | Aiming, Reaction Time, Steering, Pointing, Signal Detection, Signal Discrimination, Visual Search, Spatial Memory                                      |
| Action           | Fighting                 | Street Fighter, Tekken   | Signal Detection, Reaction Time, Steering                                                                                                              |
| Action           | Stealth                  | Metal Gear, Sly Cooper   | Signal Detection, Signal Discrimination, Reaction Time, Steering, Aiming, Pointing, Spatial Memory                                                     |
| Action           | Survival                 | Resident Evil            | Signal Detection, Signal Discrimination, Reaction Time, Steering,                                                                                      |
| Action Adventure | -                        | Legend of Zelda          | Spatial Memory, Aiming, Pointing                                                                                                                       |
| Adventure        | -                        | Myst                     | Steering, Pointing, Spatial Memory, Visual Search, Signal Detection                                                                                    |
| Roleplaying      | Action-RP                | Diablo                   | Steering, Pointing, Visual Search, Signal Detection, Signal Discrimination, Reaction Time, Aiming                                                      |
| Roleplaying      | MMORPG                   | World of Warcraft        | Signal Detection, Signal Discrimination, Reaction Time, Steering, Pointing, Aiming, Visual Search, Pattern Matching, Short Term Memory, Spatial Memory |
| Roleplaying      | Sandbox RPG              | Grand Theft Auto         | Signal Detection, Signal Discrimination, Reaction Time, Steering, Pointing, Aiming, Visual Search, Pattern Matching, Short Term Memory, Spatial Memory |
| Simulation       | -                        | Sims                     | Signal Detection, Signal Discrimination, Pointing, Visual Search, Pattern Matching, Spatial Memory                                                     |
| Strategy         | Real-Time Strategy (RTS) | Starcraft II             | Signal Detection, Signal Discrimination, Reaction Time, Pointing, Visual Search, Short Term Memory, Spatial Memory                                     |
| Strategy         | MOBA                     | League of Legends        | Signal Detection, Signal Discrimination, Reaction Time, Pointing, Aiming, Visual Search, Short Term Memory, Spatial Memory                             |
| Sports           | Racing                   | Forza Motorsports        | Signal Detection, Reaction Time, Steering, Spatial Memory                                                                                              |
| Sports           | Competitive              | Rocket League            | Signal Detection, Signal Discrimination, Reaction Time, Steering, Aiming, Visual Search, Spatial Memory                                                |
